# Supplementary material
Source: publisher site journal article supplement (https://www.dovepress.com/article/384020)
Supplement: Supplementary file 1 [file get_supplementary_file.php]

## Supplemental Fig. S1

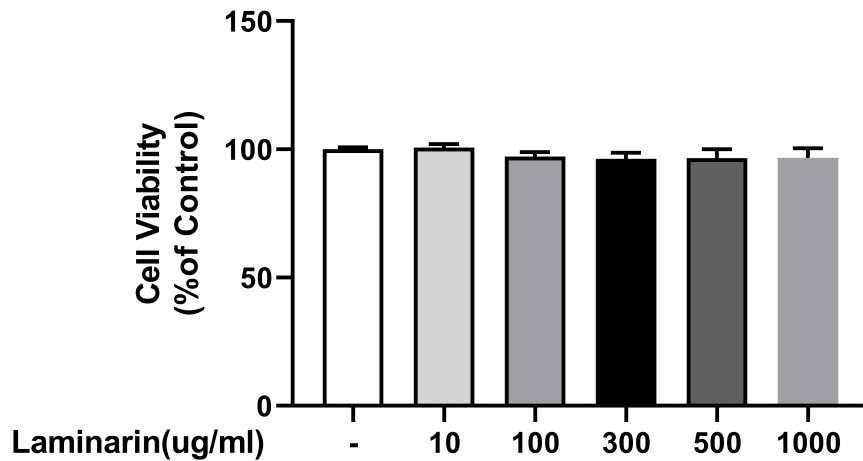

**Supplemental Fig. S1** Effects of different concentrations of Laminarin on the viability of BV2 microglia cells. BV2 microglia cells were treated with different concentrations of Laminarin for 24 h. Cell viability was determined using CCK-8 assay. n=5.
